# Supplementary material
Source: publisher site journal article supplement (https://www.dovepress.com/article/336403)
Supplement: Supplementary file 1 [file get_supplementary_file.php]

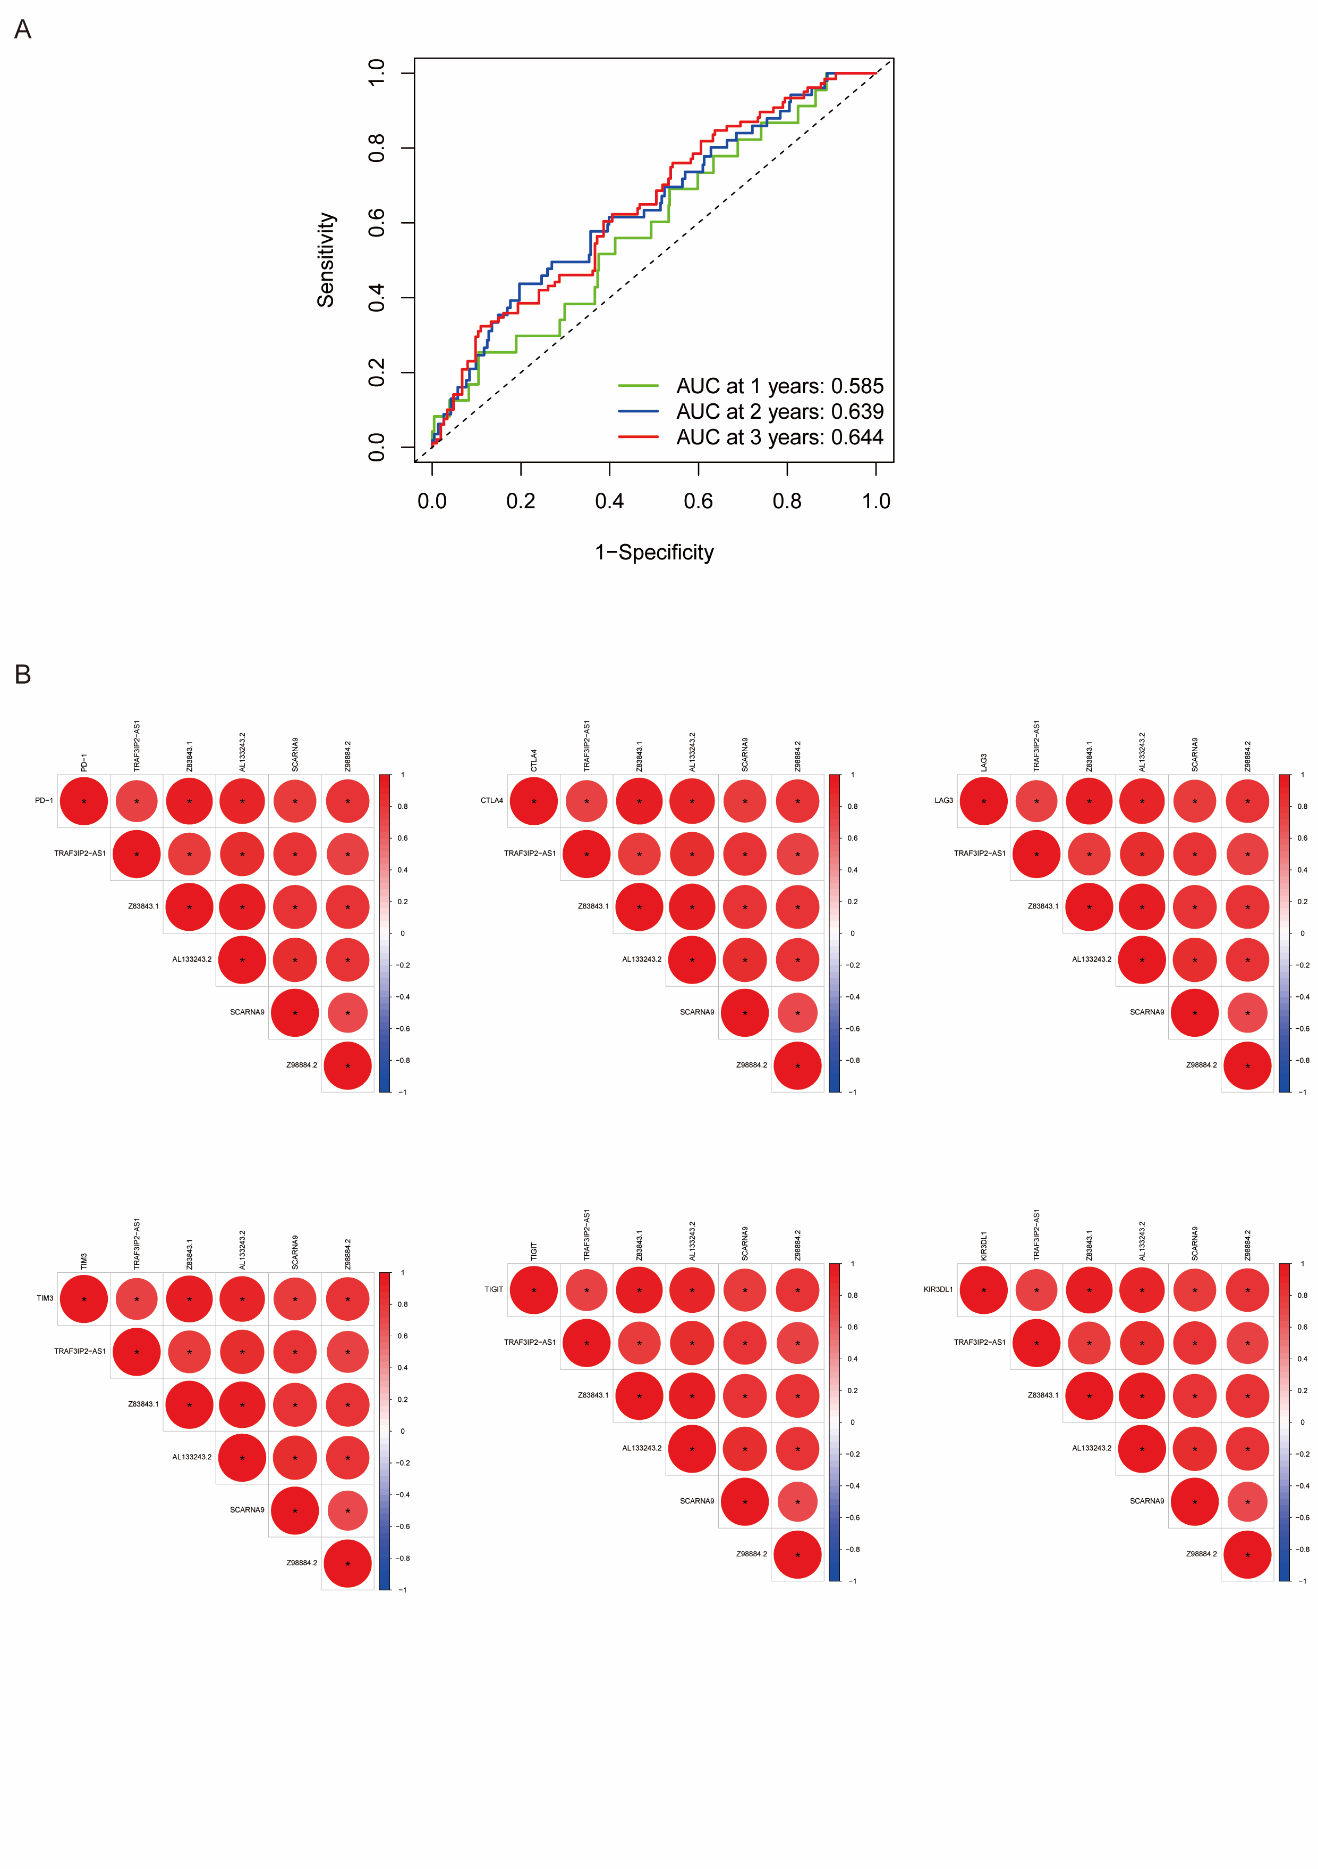


**Supplemental Figure 1** ROC curves of differential genes in endometrial cancer and co-expression analysis of m6A-related lncRNAs with immune checkpoints. (A) ROC curves for predicting the 1-, 2- and 3-year ROC curves in EC. (B) Co-expression analysis of m6A-related prognostic lncRNAs and immune gene PD-1, CTLA-4, LAG-3, TIM-3, TIGIT, and KIR3DL1.

**Supplemental Table 1** Genes related to GSEA enrichment pathways.

| **Gene** | **Full-names** |
| --- | --- |
| **ALDH5A1** | **aldehyde dehydrogenase 5 family member A1 [Source:HGNC Symbol;Acc:HGNC:408]** |
| **HMGCS1** | **3-hydroxy-3-methylglutaryl-CoA synthase 1 [Source:HGNC Symbol;Acc:HGNC:5007]** |
| **BDH1** | **3-hydroxybutyrate dehydrogenase 1 [Source:HGNC Symbol;Acc:HGNC:1027]** |
| **HMGCS2** | **3-hydroxy-3-methylglutaryl-CoA synthase 2 [Source:HGNC Symbol;Acc:HGNC:5008]** |
| **ACAT2** | **acetyl-CoA acetyltransferase 2 [Source:HGNC Symbol;Acc:HGNC:94]** |
| **ACSM3** | **acyl-CoA synthetase medium chain family member 3 [Source:HGNC Symbol;Acc:HGNC:10522]** |
| **HADH** | **hydroxyacyl-CoA dehydrogenase [Source:HGNC Symbol;Acc:HGNC:4799]** |
| **ALDH1B1** | **aldehyde dehydrogenase 1 family member B1 [Source:HGNC Symbol;Acc:HGNC:407]** |
| **OXCT1** | **3-oxoacid CoA-transferase 1 [Source:HGNC Symbol;Acc:HGNC:8527]** |
| **ALDH7A1** | **aldehyde dehydrogenase 7 family member A1 [Source:HGNC Symbol;Acc:HGNC:877]** |
| **AACS** | **acetoacetyl-CoA synthetase [Source:HGNC Symbol;Acc:HGNC:21298]** |
| **PDHA1** | **pyruvate dehydrogenase E1 alpha 1 subunit [Source:HGNC Symbol;Acc:HGNC:8806]** |
| **ACAT1** | **acetyl-CoA acetyltransferase 1 [Source:HGNC Symbol;Acc:HGNC:93]** |
| **BDH2** | **3-hydroxybutyrate dehydrogenase 2 [Source:HGNC Symbol;Acc:HGNC:32389]** |
| **PDHB** | **pyruvate dehydrogenase E1 beta subunit [Source:HGNC Symbol;Acc:HGNC:8808]** |
| **HADHA** | **hydroxyacyl-CoA dehydrogenase trifunctional multienzyme complex subunit alpha [Source:HGNC Symbol;Acc:HGNC:4801]** |
| **ALDH2** | **aldehyde dehydrogenase 2 family member [Source:HGNC Symbol;Acc:HGNC:404]** |
| **ALDH9A1** | **aldehyde dehydrogenase 9 family member A1 [Source:HGNC Symbol;Acc:HGNC:412]** |
| **ABAT** | **4-aminobutyrate aminotransferase [Source:HGNC Symbol;Acc:HGNC:23]** |
| **ACADS** | **acyl-CoA dehydrogenase short chain [Source:HGNC Symbol;Acc:HGNC:90]** |
| **L2HGDH** | **L-2-hydroxyglutarate dehydrogenase [Source:HGNC Symbol;Acc:HGNC:20499]** |
| **ECHS1** | **enoyl-CoA hydratase, short chain 1 [Source:HGNC Symbol;Acc:HGNC:3151]** |
| **EHHADH** | **enoyl-CoA hydratase and 3-hydroxyacyl CoA dehydrogenase [Source:HGNC Symbol;Acc:HGNC:3247]** |
| **ALDH3A2** | **aldehyde dehydrogenase 3 family member A2 [Source:HGNC Symbol;Acc:HGNC:403]** |
| **HMGCL** | **3-hydroxy-3-methylglutaryl-CoA lyase [Source:HGNC Symbol;Acc:HGNC:5005]** |
| **OXCT2** | **3-oxoacid CoA-transferase 2 [Source:HGNC Symbol;Acc:HGNC:18606]** |
| **PDHA2** | **pyruvate dehydrogenase E1 alpha 2 subunit [Source:HGNC Symbol;Acc:HGNC:8807]** |
| **GAD1** | **glutamate decarboxylase 1 [Source:HGNC Symbol;Acc:HGNC:4092]** |
| **AKR1B10** | **aldo-keto reductase family 1 member B10 [Source:HGNC Symbol;Acc:HGNC:382]** |
| **ACSM2A** | **acyl-CoA synthetase medium chain family member 2A [Source:HGNC Symbol;Acc:HGNC:32017]** |
| **ACSM5** | **acyl-CoA synthetase medium chain family member 5 [Source:HGNC Symbol;Acc:HGNC:26060]** |
| **GAD2** | **glutamate decarboxylase 2 [Source:HGNC Symbol;Acc:HGNC:4093]** |
| **ACSM1** | **acyl-CoA synthetase medium chain family member 1 [Source:HGNC Symbol;Acc:HGNC:18049]** |
| **POLE2** | **DNA polymerase epsilon 2, accessory subunit [Source:HGNC Symbol;Acc:HGNC:9178]** |
| **RFC3** | **replication factor C subunit 3 [Source:HGNC Symbol;Acc:HGNC:9971]** |
| **POLA1** | **DNA polymerase alpha 1, catalytic subunit [Source:HGNC Symbol;Acc:HGNC:9173]** |
| **RNASEH2A** | **ribonuclease H2 subunit A [Source:HGNC Symbol;Acc:HGNC:18518]** |
| **RFC4** | **replication factor C subunit 4 [Source:HGNC Symbol;Acc:HGNC:9972]** |
| **POLE3** | **DNA polymerase epsilon 3, accessory subunit [Source:HGNC Symbol;Acc:HGNC:13546]** |
| **MCM4** | **minichromosome maintenance complex component 4 [Source:HGNC Symbol;Acc:HGNC:6947]** |
| **MCM7** | **minichromosome maintenance complex component 7 [Source:HGNC Symbol;Acc:HGNC:6950]** |
| **MCM2** | **minichromosome maintenance complex component 2 [Source:HGNC Symbol;Acc:HGNC:6944]** |
| **MCM6** | **minichromosome maintenance complex component 6 [Source:HGNC Symbol;Acc:HGNC:6949]** |
| **DNA2** | **DNA replication helicase/nuclease 2 [Source:HGNC Symbol;Acc:HGNC:2939]** |
| **MCM5** | **minichromosome maintenance complex component 5 [Source:HGNC Symbol;Acc:HGNC:6948]** |
| **FEN1** | **flap structure-specific endonuclease 1 [Source:HGNC Symbol;Acc:HGNC:3650]** |
| **POLD2** | **DNA polymerase delta 2, accessory subunit [Source:HGNC Symbol;Acc:HGNC:9176]** |
| **PCNA** | **proliferating cell nuclear antigen [Source:HGNC Symbol;Acc:HGNC:8729]** |
| **MCM3** | **minichromosome maintenance complex component 3 [Source:HGNC Symbol;Acc:HGNC:6945]** |
| **RPA3** | **replication protein A3 [Source:HGNC Symbol;Acc:HGNC:10291]** |
| **RPA1** | **replication protein A1 [Source:HGNC Symbol;Acc:HGNC:10289]** |
| **LIG1** | **DNA ligase 1 [Source:HGNC Symbol;Acc:HGNC:6598]** |
| **POLD3** | **DNA polymerase delta 3, accessory subunit [Source:HGNC Symbol;Acc:HGNC:20932]** |
| **POLA2** | **DNA polymerase alpha 2, accessory subunit [Source:HGNC Symbol;Acc:HGNC:30073]** |
| **RFC1** | **replication factor C subunit 1 [Source:HGNC Symbol;Acc:HGNC:9969]** |
| **RNASEH2C** | **ribonuclease H2 subunit C [Source:HGNC Symbol;Acc:HGNC:24116]** |
| **RFC2** | **replication factor C subunit 2 [Source:HGNC Symbol;Acc:HGNC:9970]** |
| **POLE** | **DNA polymerase epsilon, catalytic subunit [Source:HGNC Symbol;Acc:HGNC:9177]** |
| **RNASEH1** | **ribonuclease H1 [Source:HGNC Symbol;Acc:HGNC:18466]** |
| **SSBP1** | **single stranded DNA binding protein 1 [Source:HGNC Symbol;Acc:HGNC:11317]** |
| **RPA2** | **replication protein A2 [Source:HGNC Symbol;Acc:HGNC:10290]** |
| **POLE4** | **DNA polymerase epsilon 4, accessory subunit [Source:HGNC Symbol;Acc:HGNC:18755]** |
| **PRIM2** | **DNA primase subunit 2 [Source:HGNC Symbol;Acc:HGNC:9370]** |
| **RFC5** | **replication factor C subunit 5 [Source:HGNC Symbol;Acc:HGNC:9973]** |
| **RNASEH2B** | **ribonuclease H2 subunit B [Source:HGNC Symbol;Acc:HGNC:25671]** |
| **RPA4** | **replication protein A4 [Source:HGNC Symbol;Acc:HGNC:30305]** |
| **ACAT2** | **acetyl-CoA acetyltransferase 2 [Source:HGNC Symbol;Acc:HGNC:94]** |
| **HADH** | **hydroxyacyl-CoA dehydrogenase [Source:HGNC Symbol;Acc:HGNC:4799]** |
| **ALDH1B1** | **aldehyde dehydrogenase 1 family member B1 [Source:HGNC Symbol;Acc:HGNC:407]** |
| **DLST** | **dihydrolipoamide S-succinyltransferase [Source:HGNC Symbol;Acc:HGNC:2911]** |
| **ALDH7A1** | **aldehyde dehydrogenase 7 family member A1 [Source:HGNC Symbol;Acc:HGNC:877]** |
| **NSD2** | **nuclear receptor binding SET domain protein 2 [Source:HGNC Symbol;Acc:HGNC:12766]** |
| **PLOD2** | **procollagen-lysine,2-oxoglutarate 5-dioxygenase 2 [Source:HGNC Symbol;Acc:HGNC:9082]** |
| **ACAT1** | **acetyl-CoA acetyltransferase 1 [Source:HGNC Symbol;Acc:HGNC:93]** |
| **SUV39H2** | **suppressor of variegation 3-9 homolog 2 [Source:HGNC Symbol;Acc:HGNC:17287]** |
| **HADHA** | **hydroxyacyl-CoA dehydrogenase trifunctional multienzyme complex subunit alpha [Source:HGNC Symbol;Acc:HGNC:4801]** |
| **ALDH2** | **aldehyde dehydrogenase 2 family member [Source:HGNC Symbol;Acc:HGNC:404]** |
| **EHMT2** | **euchromatic histone lysine methyltransferase 2 [Source:HGNC Symbol;Acc:HGNC:14129]** |
| **ALDH9A1** | **aldehyde dehydrogenase 9 family member A1 [Source:HGNC Symbol;Acc:HGNC:412]** |
| **SETD2** | **SET domain containing 2, histone lysine methyltransferase [Source:HGNC Symbol;Acc:HGNC:18420]** |
| **KMT5B** | **lysine methyltransferase 5B [Source:HGNC Symbol;Acc:HGNC:24283]** |
| **ECHS1** | **enoyl-CoA hydratase, short chain 1 [Source:HGNC Symbol;Acc:HGNC:3151]** |
| **AASDHPPT** | **aminoadipate-semialdehyde dehydrogenase-phosphopantetheinyl transferase [Source:HGNC Symbol;Acc:HGNC:14235]** |
| **EHHADH** | **enoyl-CoA hydratase and 3-hydroxyacyl CoA dehydrogenase [Source:HGNC Symbol;Acc:HGNC:3247]** |
| **SUV39H1** | **suppressor of variegation 3-9 homolog 1 [Source:HGNC Symbol;Acc:HGNC:11479]** |
| **OGDHL** | **oxoglutarate dehydrogenase like [Source:HGNC Symbol;Acc:HGNC:25590]** |
| **ALDH3A2** | **aldehyde dehydrogenase 3 family member A2 [Source:HGNC Symbol;Acc:HGNC:403]** |
| **KMT5C** | **lysine methyltransferase 5C [Source:HGNC Symbol;Acc:HGNC:28405]** |
| **AADAT** | **aminoadipate aminotransferase [Source:HGNC Symbol;Acc:HGNC:17929]** |
| **OGDH** | **oxoglutarate dehydrogenase [Source:HGNC Symbol;Acc:HGNC:8124]** |
| **KMT5A** | **lysine methyltransferase 5A [Source:HGNC Symbol;Acc:HGNC:29489]** |
| **AASDH** | **aminoadipate-semialdehyde dehydrogenase [Source:HGNC Symbol;Acc:HGNC:23993]** |
| **SETD1A** | **SET domain containing 1A, histone lysine methyltransferase [Source:HGNC Symbol;Acc:HGNC:29010]** |
| **GCDH** | **glutaryl-CoA dehydrogenase [Source:HGNC Symbol;Acc:HGNC:4189]** |
| **EHMT1** | **euchromatic histone lysine methyltransferase 1 [Source:HGNC Symbol;Acc:HGNC:24650]** |
| **SETDB2** | **SET domain bifurcated histone lysine methyltransferase 2 [Source:HGNC Symbol;Acc:HGNC:20263]** |
| **SETDB1** | **SET domain bifurcated histone lysine methyltransferase 1 [Source:HGNC Symbol;Acc:HGNC:10761]** |
| **SETD1B** | **SET domain containing 1B, histone lysine methyltransferase [Source:HGNC Symbol;Acc:HGNC:29187]** |
| **NSD3** | **nuclear receptor binding SET domain protein 3 [Source:HGNC Symbol;Acc:HGNC:12767]** |
| **SETMAR** | **SET domain and mariner transposase fusion gene [Source:HGNC Symbol;Acc:HGNC:10762]** |
| **BBOX1** | **gamma-butyrobetaine hydroxylase 1 [Source:HGNC Symbol;Acc:HGNC:964]** |
| **NSD1** | **nuclear receptor binding SET domain protein 1 [Source:HGNC Symbol;Acc:HGNC:14234]** |
| **PLOD3** | **procollagen-lysine,2-oxoglutarate 5-dioxygenase 3 [Source:HGNC Symbol;Acc:HGNC:9083]** |
| **SETD7** | **SET domain containing 7, histone lysine methyltransferase [Source:HGNC Symbol;Acc:HGNC:30412]** |
| **DOT1L** | **DOT1 like histone lysine methyltransferase [Source:HGNC Symbol;Acc:HGNC:24948]** |
| **PIPOX** | **pipecolic acid and sarcosine oxidase [Source:HGNC Symbol;Acc:HGNC:17804]** |
| **ASH1L** | **ASH1 like histone lysine methyltransferase [Source:HGNC Symbol;Acc:HGNC:19088]** |
| **AASS** | **aminoadipate-semialdehyde synthase [Source:HGNC Symbol;Acc:HGNC:17366]** |
| **PLOD1** | **procollagen-lysine,2-oxoglutarate 5-dioxygenase 1 [Source:HGNC Symbol;Acc:HGNC:9081]** |
| **TUSC3** | **tumor suppressor candidate 3 [Source:HGNC Symbol;Acc:HGNC:30242]** |
| **ALG14** | **ALG14 UDP-N-acetylglucosaminyltransferase subunit [Source:HGNC Symbol;Acc:HGNC:28287]** |
| **DPM3** | **dolichyl-phosphate mannosyltransferase subunit 3 [Source:HGNC Symbol;Acc:HGNC:3007]** |
| **MGAT4A** | **alpha-1,3-mannosyl-glycoprotein 4-beta-N-acetylglucosaminyltransferase A [Source:HGNC Symbol;Acc:HGNC:7047]** |
| **B4GALT1** | **beta-1,4-galactosyltransferase 1 [Source:HGNC Symbol;Acc:HGNC:924]** |
| **ALG10B** | **ALG10 alpha-1,2-glucosyltransferase B [Source:HGNC Symbol;Acc:HGNC:31088]** |
| **ALG12** | **ALG12 alpha-1,6-mannosyltransferase [Source:HGNC Symbol;Acc:HGNC:19358]** |
| **GANAB** | **glucosidase II alpha subunit [Source:HGNC Symbol;Acc:HGNC:4138]** |
| **ALG8** | **ALG8 alpha-1,3-glucosyltransferase [Source:HGNC Symbol;Acc:HGNC:23161]** |
| **ALG13** | **ALG13 UDP-N-acetylglucosaminyltransferase subunit [Source:HGNC Symbol;Acc:HGNC:30881]** |
| **ALG6** | **ALG6 alpha-1,3-glucosyltransferase [Source:HGNC Symbol;Acc:HGNC:23157]** |
| **STT3A** | **STT3 oligosaccharyltransferase complex catalytic subunit A [Source:HGNC Symbol;Acc:HGNC:6172]** |
| **MGAT4B** | **alpha-1,3-mannosyl-glycoprotein 4-beta-N-acetylglucosaminyltransferase B [Source:HGNC Symbol;Acc:HGNC:7048]** |
| **DPAGT1** | **dolichyl-phosphate N-acetylglucosaminephosphotransferase 1 [Source:HGNC Symbol;Acc:HGNC:2995]** |
| **ALG1** | **ALG1 chitobiosyldiphosphodolichol beta-mannosyltransferase [Source:HGNC Symbol;Acc:HGNC:18294]** |
| **DOLPP1** | **dolichyldiphosphatase 1 [Source:HGNC Symbol;Acc:HGNC:29565]** |
| **STT3B** | **STT3 oligosaccharyltransferase complex catalytic subunit B [Source:HGNC Symbol;Acc:HGNC:30611]** |
| **B4GALT2** | **beta-1,4-galactosyltransferase 2 [Source:HGNC Symbol;Acc:HGNC:925]** |
| **ALG5** | **ALG5 dolichyl-phosphate beta-glucosyltransferase [Source:HGNC Symbol;Acc:HGNC:20266]** |
| **DDOST** | **dolichyl-diphosphooligosaccharide--protein glycosyltransferase non-catalytic subunit [Source:HGNC Symbol;Acc:HGNC:2728]** |
| **ALG11** | **ALG11 alpha-1,2-mannosyltransferase [Source:HGNC Symbol;Acc:HGNC:32456]** |
| **RPN1** | **ribophorin I [Source:HGNC Symbol;Acc:HGNC:10381]** |
| **MAN1A2** | **mannosidase alpha class 1A member 2 [Source:HGNC Symbol;Acc:HGNC:6822]** |
| **ALG9** | **ALG9 alpha-1,2-mannosyltransferase [Source:HGNC Symbol;Acc:HGNC:15672]** |
| **MGAT5** | **alpha-1,6-mannosylglycoprotein 6-beta-N-acetylglucosaminyltransferase [Source:HGNC Symbol;Acc:HGNC:7049]** |
| **B4GALT3** | **beta-1,4-galactosyltransferase 3 [Source:HGNC Symbol;Acc:HGNC:926]** |
| **MGAT3** | **mannosyl (beta-1,4-)-glycoprotein beta-1,4-N-acetylglucosaminyltransferase [Source:HGNC Symbol;Acc:HGNC:7046]** |
| **ALG3** | **ALG3 alpha-1,3- mannosyltransferase [Source:HGNC Symbol;Acc:HGNC:23056]** |
| **MAN1C1** | **mannosidase alpha class 1C member 1 [Source:HGNC Symbol;Acc:HGNC:19080]** |
| **DPM2** | **dolichyl-phosphate mannosyltransferase subunit 2, regulatory [Source:HGNC Symbol;Acc:HGNC:3006]** |
| **RFT1** | **RFT1 homolog [Source:HGNC Symbol;Acc:HGNC:30220]** |
| **ALG10** | **ALG10 alpha-1,2-glucosyltransferase [Source:HGNC Symbol;Acc:HGNC:23162]** |
| **MOGS** | **mannosyl-oligosaccharide glucosidase [Source:HGNC Symbol;Acc:HGNC:24862]** |
| **MGAT2** | **mannosyl (alpha-1,6-)-glycoprotein beta-1,2-N-acetylglucosaminyltransferase [Source:HGNC Symbol;Acc:HGNC:7045]** |
| **MAN2A1** | **mannosidase alpha class 2A member 1 [Source:HGNC Symbol;Acc:HGNC:6824]** |
| **DPM1** | **dolichyl-phosphate mannosyltransferase subunit 1, catalytic [Source:HGNC Symbol;Acc:HGNC:3005]** |
| **MGAT5B** | **alpha-1,6-mannosylglycoprotein 6-beta-N-acetylglucosaminyltransferase B [Source:HGNC Symbol;Acc:HGNC:24140]** |
| **FUT8** | **fucosyltransferase 8 [Source:HGNC Symbol;Acc:HGNC:4019]** |
| **DAD1** | **defender against cell death 1 [Source:HGNC Symbol;Acc:HGNC:2664]** |
| **ALG2** | **ALG2 alpha-1,3/1,6-mannosyltransferase [Source:HGNC Symbol;Acc:HGNC:23159]** |
| **MAN1A1** | **mannosidase alpha class 1A member 1 [Source:HGNC Symbol;Acc:HGNC:6821]** |
| **RPN2** | **ribophorin II [Source:HGNC Symbol;Acc:HGNC:10382]** |
| **MAN1B1** | **mannosidase alpha class 1B member 1 [Source:HGNC Symbol;Acc:HGNC:6823]** |
| **MGAT1** | **mannosyl (alpha-1,3-)-glycoprotein beta-1,2-N-acetylglucosaminyltransferase [Source:HGNC Symbol;Acc:HGNC:7044]** |
| **MAN2A2** | **mannosidase alpha class 2A member 2 [Source:HGNC Symbol;Acc:HGNC:6825]** |
| **ST6GAL1** | **ST6 beta-galactoside alpha-2,6-sialyltransferase 1 [Source:HGNC Symbol;Acc:HGNC:10860]** |
| **LSM2** | **LSM2 homolog, U6 small nuclear RNA and mRNA degradation associated [Source:HGNC Symbol;Acc:HGNC:13940]** |
| **ZCCHC7** | **zinc finger CCHC-type containing 7 [Source:HGNC Symbol;Acc:HGNC:26209]** |
| **LSM7** | **LSM7 homolog, U6 small nuclear RNA and mRNA degradation associated [Source:HGNC Symbol;Acc:HGNC:20470]** |
| **LSM5** | **LSM5 homolog, U6 small nuclear RNA and mRNA degradation associated [Source:HGNC Symbol;Acc:HGNC:17162]** |
| **EXOSC8** | **exosome component 8 [Source:HGNC Symbol;Acc:HGNC:17035]** |
| **WDR61** | **WD repeat domain 61 [Source:HGNC Symbol;Acc:HGNC:30300]** |
| **LSM4** | **LSM4 homolog, U6 small nuclear RNA and mRNA degradation associated [Source:NCBI gene;Acc:25804]** |
| **CNOT6** | **CCR4-NOT transcription complex subunit 6 [Source:HGNC Symbol;Acc:HGNC:14099]** |
| **EXOSC5** | **exosome component 5 [Source:HGNC Symbol;Acc:HGNC:24662]** |
| **HSPA9** | **heat shock protein family A (Hsp70) member 9 [Source:HGNC Symbol;Acc:HGNC:5244]** |
| **DCPS** | **decapping enzyme, scavenger [Source:HGNC Symbol;Acc:HGNC:29812]** |
| **EXOSC7** | **exosome component 7 [Source:HGNC Symbol;Acc:HGNC:28112]** |
| **EXOSC1** | **exosome component 1 [Source:HGNC Symbol;Acc:HGNC:17286]** |
| **LSM3** | **LSM3 homolog, U6 small nuclear RNA and mRNA degradation associated [Source:HGNC Symbol;Acc:HGNC:17874]** |
| **EXOSC2** | **exosome component 2 [Source:HGNC Symbol;Acc:HGNC:17097]** |
| **CNOT7** | **CCR4-NOT transcription complex subunit 7 [Source:HGNC Symbol;Acc:HGNC:14101]** |
| **TENT4A** | **terminal nucleotidyltransferase 4A [Source:HGNC Symbol;Acc:HGNC:16705]** |
| **EXOSC10** | **exosome component 10 [Source:HGNC Symbol;Acc:HGNC:9138]** |
| **CNOT9** | **CCR4-NOT transcription complex subunit 9 [Source:HGNC Symbol;Acc:HGNC:10445]** |
| **EXOSC9** | **exosome component 9 [Source:HGNC Symbol;Acc:HGNC:9137]** |
| **TTC37** | **tetratricopeptide repeat domain 37 [Source:HGNC Symbol;Acc:HGNC:23639]** |
| **LSM8** | **LSM8 homolog, U6 small nuclear RNA associated [Source:HGNC Symbol;Acc:HGNC:20471]** |
| **LSM6** | **LSM6 homolog, U6 small nuclear RNA and mRNA degradation associated [Source:HGNC Symbol;Acc:HGNC:17017]** |
| **PARN** | **poly(A)-specific ribonuclease [Source:HGNC Symbol;Acc:HGNC:8609]** |
| **CNOT1** | **CCR4-NOT transcription complex subunit 1 [Source:HGNC Symbol;Acc:HGNC:7877]** |
| **EXOSC6** | **exosome component 6 [Source:HGNC Symbol;Acc:HGNC:19055]** |
| **MTREX** | **Mtr4 exosome RNA helicase [Source:HGNC Symbol;Acc:HGNC:18734]** |
| **CNOT3** | **CCR4-NOT transcription complex subunit 3 [Source:HGNC Symbol;Acc:HGNC:7879]** |
| **AC092881.1** | **CCR4-NOT transcription complex subunit 2 [Source:NCBI gene;Acc:4848]** |
| **EXOSC3** | **exosome component 3 [Source:HGNC Symbol;Acc:HGNC:17944]** |
| **CNOT8** | **CCR4-NOT transcription complex subunit 8 [Source:HGNC Symbol;Acc:HGNC:9207]** |
| **CNOT10** | **CCR4-NOT transcription complex subunit 10 [Source:HGNC Symbol;Acc:HGNC:23817]** |
| **DIS3** | **DIS3 homolog, exosome endoribonuclease and 3'-5' exoribonuclease [Source:HGNC Symbol;Acc:HGNC:20604]** |
| **HSPD1** | **heat shock protein family D (Hsp60) member 1 [Source:HGNC Symbol;Acc:HGNC:5261]** |
| **DCP1A** | **decapping mRNA 1A [Source:HGNC Symbol;Acc:HGNC:18714]** |
| **DCP1B** | **decapping mRNA 1B [Source:HGNC Symbol;Acc:HGNC:24451]** |
| **PAPOLA** | **poly(A) polymerase alpha [Source:HGNC Symbol;Acc:HGNC:14981]** |
| **CNOT6L** | **CCR4-NOT transcription complex subunit 6 like [Source:HGNC Symbol;Acc:HGNC:18042]** |
| **ENO3** | **enolase 3 [Source:HGNC Symbol;Acc:HGNC:3354]** |
| **PATL1** | **PAT1 homolog 1, processing body mRNA decay factor [Source:HGNC Symbol;Acc:HGNC:26721]** |
| **EDC3** | **enhancer of mRNA decapping 3 [Source:HGNC Symbol;Acc:HGNC:26114]** |
| **PNPT1** | **polyribonucleotide nucleotidyltransferase 1 [Source:HGNC Symbol;Acc:HGNC:23166]** |
| **DDX6** | **DEAD-box helicase 6 [Source:HGNC Symbol;Acc:HGNC:2747]** |
| **PAPOLB** | **poly(A) polymerase beta [Source:HGNC Symbol;Acc:HGNC:15970]** |
| **ENO1** | **enolase 1 [Source:HGNC Symbol;Acc:HGNC:3350]** |
| **CNOT4** | **CCR4-NOT transcription complex subunit 4 [Source:HGNC Symbol;Acc:HGNC:7880]** |
| **PAPOLG** | **poly(A) polymerase gamma [Source:HGNC Symbol;Acc:HGNC:14982]** |
| **C1D** | **C1D nuclear receptor corepressor [Source:HGNC Symbol;Acc:HGNC:29911]** |
| **LSM1** | **LSM1 homolog, mRNA degradation associated [Source:HGNC Symbol;Acc:HGNC:20472]** |
| **DCP2** | **decapping mRNA 2 [Source:HGNC Symbol;Acc:HGNC:24452]** |
| **XRN2** | **5'-3' exoribonuclease 2 [Source:HGNC Symbol;Acc:HGNC:12836]** |
| **EXOSC4** | **exosome component 4 [Source:HGNC Symbol;Acc:HGNC:18189]** |
| **XRN1** | **5'-3' exoribonuclease 1 [Source:HGNC Symbol;Acc:HGNC:30654]** |
| **MPHOSPH6** | **M-phase phosphoprotein 6 [Source:HGNC Symbol;Acc:HGNC:7214]** |
| **SKIV2L** | **Ski2 like RNA helicase [Source:HGNC Symbol;Acc:HGNC:10898]** |
| **ENO2** | **enolase 2 [Source:HGNC Symbol;Acc:HGNC:3353]** |
| **ADH1C** | **alcohol dehydrogenase 1C (class I), gamma polypeptide [Source:HGNC Symbol;Acc:HGNC:251]** |
| **ADH1B** | **alcohol dehydrogenase 1B (class I), beta polypeptide [Source:HGNC Symbol;Acc:HGNC:250]** |
| **DDC** | **dopa decarboxylase [Source:HGNC Symbol;Acc:HGNC:2719]** |
| **MAOA** | **monoamine oxidase A [Source:HGNC Symbol;Acc:HGNC:6833]** |
| **AOC3** | **amine oxidase copper containing 3 [Source:HGNC Symbol;Acc:HGNC:550]** |
| **ADH6** | **alcohol dehydrogenase 6 (class V) [Source:HGNC Symbol;Acc:HGNC:255]** |
| **GOT1** | **glutamic-oxaloacetic transaminase 1 [Source:HGNC Symbol;Acc:HGNC:4432]** |
| **GSTZ1** | **glutathione S-transferase zeta 1 [Source:HGNC Symbol;Acc:HGNC:4643]** |
| **TRMT11** | **tRNA methyltransferase 11 homolog [Source:HGNC Symbol;Acc:HGNC:21080]** |
| **GOT2** | **glutamic-oxaloacetic transaminase 2 [Source:HGNC Symbol;Acc:HGNC:4433]** |
| **TYRP1** | **tyrosinase related protein 1 [Source:HGNC Symbol;Acc:HGNC:12450]** |
| **ALDH1A3** | **aldehyde dehydrogenase 1 family member A3 [Source:HGNC Symbol;Acc:HGNC:409]** |
| **FAH** | **fumarylacetoacetate hydrolase [Source:HGNC Symbol;Acc:HGNC:3579]** |
| **ADH5** | **alcohol dehydrogenase 5 (class III), chi polypeptide [Source:HGNC Symbol;Acc:HGNC:253]** |
| **BUD23** | **BUD23 rRNA methyltransferase and ribosome maturation factor [Source:HGNC Symbol;Acc:HGNC:16405]** |
| **ADH1A** | **alcohol dehydrogenase 1A (class I), alpha polypeptide [Source:HGNC Symbol;Acc:HGNC:249]** |
| **HGD** | **homogentisate 1,2-dioxygenase [Source:HGNC Symbol;Acc:HGNC:4892]** |
| **METTL2B** | **methyltransferase like 2B [Source:HGNC Symbol;Acc:HGNC:18272]** |
| **LCMT1** | **leucine carboxyl methyltransferase 1 [Source:HGNC Symbol;Acc:HGNC:17557]** |
| **LCMT2** | **leucine carboxyl methyltransferase 2 [Source:HGNC Symbol;Acc:HGNC:17558]** |
| **TPO** | **thyroid peroxidase [Source:HGNC Symbol;Acc:HGNC:12015]** |
| **TH** | **tyrosine hydroxylase [Source:HGNC Symbol;Acc:HGNC:11782]** |
| **METTL6** | **methyltransferase like 6 [Source:HGNC Symbol;Acc:HGNC:28343]** |
| **NAA80** | **N(alpha)-acetyltransferase 80, NatH catalytic subunit [Source:HGNC Symbol;Acc:HGNC:30252]** |
| **DCT** | **dopachrome tautomerase [Source:HGNC Symbol;Acc:HGNC:2709]** |
| **COMT** | **catechol-O-methyltransferase [Source:HGNC Symbol;Acc:HGNC:2228]** |
| **HEMK1** | **HemK methyltransferase family member 1 [Source:HGNC Symbol;Acc:HGNC:24923]** |
| **PNMT** | **phenylethanolamine N-methyltransferase [Source:HGNC Symbol;Acc:HGNC:9160]** |
| **ADH7** | **alcohol dehydrogenase 7 (class IV), mu or sigma polypeptide [Source:HGNC Symbol;Acc:HGNC:256]** |
| **TYR** | **tyrosinase [Source:HGNC Symbol;Acc:HGNC:12442]** |
| **ADH4** | **alcohol dehydrogenase 4 (class II), pi polypeptide [Source:HGNC Symbol;Acc:HGNC:252]** |
| **HPD** | **4-hydroxyphenylpyruvate dioxygenase [Source:HGNC Symbol;Acc:HGNC:5147]** |
| **TAT** | **tyrosine aminotransferase [Source:HGNC Symbol;Acc:HGNC:11573]** |
| **AOC2** | **amine oxidase copper containing 2 [Source:HGNC Symbol;Acc:HGNC:549]** |
| **DBH** | **dopamine beta-hydroxylase [Source:HGNC Symbol;Acc:HGNC:2689]** |
| **ALDH3B2** | **aldehyde dehydrogenase 3 family member B2 [Source:HGNC Symbol;Acc:HGNC:411]** |
| **ALDH3A1** | **aldehyde dehydrogenase 3 family member A1 [Source:HGNC Symbol;Acc:HGNC:405]** |
| **ALDH3B1** | **aldehyde dehydrogenase 3 family member B1 [Source:HGNC Symbol;Acc:HGNC:410]** |
| **MAOB** | **monoamine oxidase B [Source:HGNC Symbol;Acc:HGNC:6834]** |
| **AOX1** | **aldehyde oxidase 1 [Source:HGNC Symbol;Acc:HGNC:553]** |
| **IL4I1** | **interleukin 4 induced 1 [Source:HGNC Symbol;Acc:HGNC:19094]** |
